# Supplementary material
Source: PubMed Central journal article supplement (PMC3542460)
Supplement: mmc1.pdf [file mmc1.pdf]

**American Journal of Human Genetics, Volume 92**

## **Supplemental Information**

### **Refinement in Localization and Identification of Gene Regions Associated with Crohn Disease**

**Heather Elding, Winston Lau, Dallas M. Swallow, and Nikolas Maniatis**

#### **Supplemental Inventory**

##### **Supplemental Tables**

Table S1, Related to Table 1

Table S2, Related to Table 2

Table S3, Related to Table 3

Table S4, Related to Tables S1–S3

Table S5, see separate Excel document

**Table S1. Whole-Genome Association Statistics and Closest Gene to the Estimated Location of the Causal Agent  $\hat{S}$  for the Previously Reported 71 LD Intervals**

| Chr      | Reported LD Interval (Mb) | Interval Span (Mb) | WTCCC $\hat{S}$ | WTCCC P-value         | NIDDK $\hat{S}$ | NIDDK P-value         | Gene region (WTCCC/NIDDK if different)                    |
|----------|---------------------------|--------------------|-----------------|-----------------------|-----------------|-----------------------|-----------------------------------------------------------|
| 1p36.23  | 7.74 - 7.97               | 0.23               | -               | -                     | 7,801.1         | 2.2x10 <sup>-05</sup> | <i>CAMTA1</i> <sup>a</sup>                                |
| 1p31.3   | 67.36 - 67.77             | 0.41               | 67,684.8        | 2.1x10 <sup>-11</sup> | 67,707.3        | 3.0x10 <sup>-10</sup> | <i>IL23R</i> <sup>a</sup>                                 |
| 1p13.2   | 113.95 - 114.62           | 0.67               | 114,560.3       | 1.4x10 <sup>-03</sup> | 114,108.3       | 5.0x10 <sup>-03</sup> | <i>OLFML3/MAG13</i> <sup>a</sup>                          |
| 1q22     | 154.97 - 156.13           | 1.16               | -               | -                     | -               | -                     | -                                                         |
| 1q23.3   | 160.69 - 162.47           | 1.78               | 160,887.0       | 2.6x10 <sup>-03</sup> | 160,837.3       | 5.8x10 <sup>-03</sup> | <i>ITLN2/CD244</i>                                        |
| 1q25.1   | 172.66 - 172.95           | 0.29               | 172,891.9       | 3.6x10 <sup>-13</sup> | -               | -                     | <i>TNFSF18</i>                                            |
| 1q31.3   | 197.32 - 197.95           | 0.63               | 197,786.1       | 1.2x10 <sup>-04</sup> | -               | -                     | <i>DENND1B</i>                                            |
| 1q32.1   | 200.85 - 201.06           | 0.21               | 200,877.3       | 3.0x10 <sup>-14</sup> | 200,957.2       | 1.5x10 <sup>-02</sup> | <i>C1orf106</i> <sup>a</sup> / <i>KIF21B</i> <sup>a</sup> |
| 1q32.1   | 206.80 - 207.03           | 0.23               | -               | -                     | -               | -                     | -                                                         |
| 2p23.3   | 25.45 - 25.60             | 0.15               | 25,389.2        | 3.5x10 <sup>-02</sup> | -               | -                     | <i>POMC</i> <sup>a</sup>                                  |
| 2p23.3   | 27.39 - 27.86             | 0.47               | 27,697.4        | 5.4x10 <sup>-04</sup> | 27,619.3        | 2.3x10 <sup>-11</sup> | <i>IFT172</i> <sup>a</sup> / <i>PPM1G</i> <sup>a</sup>    |
| 2p21     | 43.45 - 43.95             | 0.50               | 43,840.8        | 2.0x10 <sup>-05</sup> | 43,581.0        | 1.1x10 <sup>-02</sup> | <i>THADA</i> <sup>a</sup>                                 |
| 2p15     | 60.92 - 61.89             | 0.97               | 61,395.5        | 1.9x10 <sup>-05</sup> | -               | -                     | <i>C2orf74</i>                                            |
| 2q12.1   | 102.80 - 103.30           | 0.50               | 103,059.8       | 1.8x10 <sup>-08</sup> | 102,951.7       | 1.7x10 <sup>-05</sup> | <i>IL18RAP</i> <sup>a</sup> / <i>IL1RL1</i> <sup>a</sup>  |
| 2q33.1   | 198.14 - 198.96           | 0.82               | 198,957.7       | 1.6x10 <sup>-02</sup> | 198,205.8       | 1.1x10 <sup>-03</sup> | <i>PLCL1</i> <sup>a</sup> / <i>ANKRD44</i>                |
| 2q37.1   | 231.05 - 231.23           | 0.18               | 231,109.3       | 2.8x10 <sup>-05</sup> | -               | -                     | <i>SP140</i> <sup>a</sup>                                 |
| 2q37.1   | 234.15 - 234.57           | 0.42               | 234,144.8       | 5.6x10 <sup>-25</sup> | 234,171.9       | 2.2x10 <sup>-09</sup> | <i>ATG16L1</i> <sup>a</sup>                               |
| 3p24.3   | 18.60 - 18.88             | 0.28               | 18,707.0        | 5.3x10 <sup>-03</sup> | 18,629.1        | 2.6x10 <sup>-05</sup> | <i>SATB1</i>                                              |
| 3p21.31  | 48.18 - 51.75             | 3.57               | 49,743.9        | 1.7x10 <sup>-31</sup> | 48,818.0        | 3.3x10 <sup>-19</sup> | <i>RNF123</i> <sup>a</sup> / <i>PRKAR2A</i> <sup>a</sup>  |
| 5p13.1   | 39.84 - 40.96             | 1.12               | 40,447.1        | 6.0x10 <sup>-51</sup> | 40,288.0        | 2.7x10 <sup>-07</sup> | <i>PTGER4</i>                                             |
| 5q13.2   | 72.45 - 72.58             | 0.13               | 72,465.4        | 5.8x10 <sup>-03</sup> | -               | -                     | <i>TMEM174</i>                                            |
| 5q15     | 96.08 - 96.42             | 0.34               | 96,372.2        | 1.3x10 <sup>-08</sup> | -               | -                     | <i>LNPEP</i>                                              |
| 5q31.1   | 129.38 - 132.02           | 2.64               | 131,748.2       | 2.7x10 <sup>-22</sup> | 131,631.4       | 8.9x10 <sup>-07</sup> | <i>C5orf56</i> <sup>a</sup> / <i>SLC22A4</i> <sup>a</sup> |
| 5q31.3   | 141.41 - 141.64           | 0.23               | 141,480.3       | 1.3x10 <sup>-02</sup> | -               | -                     | <i>NDFIP1</i>                                             |
| 5q33.1   | 150.03 - 150.40           | 0.37               | 150,230.7       | 3.6x10 <sup>-09</sup> | -               | -                     | <i>IRGM</i>                                               |
| 5q33.3   | 158.50 - 158.95           | 0.45               | 158,825.7       | 5.6x10 <sup>-06</sup> | 158,826.0       | 3.5x10 <sup>-02</sup> | <i>IL12B</i>                                              |
| 5q35.2   | 173.22 - 173.54           | 0.32               | -               | -                     | 173,417.9       | 6.7x10 <sup>-03</sup> | <i>C5orf47</i> <sup>a</sup>                               |
| 6p25.2   | 3.41 - 3.47               | 0.06               | 3,417.6         | 1.5x10 <sup>-07</sup> | -               | -                     | <i>SLC22A23</i> <sup>a</sup>                              |
| 6p22.3   | 20.49 - 21.14             | 0.65               | 20,559.3        | 4.3x10 <sup>-03</sup> | 20,433.1        | 2.8x10 <sup>-03</sup> | <i>CDKAL1</i> <sup>a</sup> / <i>E2F3</i> <sup>a</sup>     |
| 6p21.32  | 31.38 - 32.87             | 1.49               | 32,720.6        | 1.2x10 <sup>-27</sup> | 32,193.4        | 1.6x10 <sup>-07</sup> | <i>HLA-DQB2</i>                                           |
| 6q15     | 90.80 - 91.08             | 0.28               | -               | -                     | -               | -                     | -                                                         |
| 6q21     | 106.39 - 106.56           | 0.17               | -               | -                     | 106,421.7       | 4.0x10 <sup>-02</sup> | <i>PRDM1</i>                                              |
| 6q25.3   | 159.34 - 159.54           | 0.20               | 159,539.7       | 1.2x10 <sup>-03</sup> | -               | -                     | <i>FNDC1</i>                                              |
| 6q27     | 167.34 - 167.55           | 0.21               | 167,441.4       | 3.3x10 <sup>-09</sup> | 167,355.9       | 8.5x10 <sup>-03</sup> | <i>FGFR1OP</i> <sup>a</sup> / <i>RNASET2</i> <sup>a</sup> |
| 7p12.2   | 50.25 - 50.33             | 0.08               | 50,255.3        | 9.4x10 <sup>-04</sup> | -               | -                     | <i>C7orf72</i>                                            |
| 8q24.13  | 126.47 - 126.58           | 0.11               | 126,544.1       | 4.5x10 <sup>-05</sup> | -               | -                     | <i>TRIB1</i>                                              |
| 8q24.21  | 129.49 - 129.60           | 0.11               | 129,567.2       | 1.3x10 <sup>-04</sup> | 129,570.7       | 2.9x10 <sup>-03</sup> | <b>Intergenic</b>                                         |
| 9p24.1   | 4.94 - 5.30               | 0.36               | 5,274.6         | 1.4x10 <sup>-04</sup> | 5,270.3         | 5.4x10 <sup>-03</sup> | <b>RLN2</b>                                               |
| 9q32     | 117.43 - 117.70           | 0.27               | 117,555.6       | 3.9x10 <sup>-04</sup> | -               | -                     | <i>TNFSF15</i>                                            |
| 9q34.3   | 139.13 - 139.42           | 0.29               | 139,280.8       | 2.3x10 <sup>-05</sup> | 139,299.7       | 2.6x10 <sup>-03</sup> | <i>SNAPC4</i> <sup>a</sup> / <i>SDCCAG3</i> <sup>a</sup>  |
| 10p15.1  | 6.03 - 6.17               | 0.14               | 6,189.9         | 3.6x10 <sup>-03</sup> | 6,165.5         | 1.2x10 <sup>-08</sup> | <i>PFKFB3</i> <sup>a</sup> / <i>RBM17</i>                 |
| 10p11.21 | 35.18 - 35.90             | 0.72               | 35,554.8        | 3.4x10 <sup>-29</sup> | -               | -                     | <i>CCNY</i> <sup>a</sup>                                  |
| 10q21.1  | 59.83 - 60.14             | 0.31               | 59,892.8        | 9.3x10 <sup>-09</sup> | 59,893.1        | 1.6x10 <sup>-02</sup> | <i>IPMK</i>                                               |
| 10q21.2  | 64.30 - 64.76             | 0.46               | 64,448.3        | 1.2x10 <sup>-18</sup> | -               | -                     | <i>ZNF365</i>                                             |
| 10q22.3  | 81.00 - 81.10             | 0.10               | -               | -                     | 81,019.8        | 1.5x10 <sup>-02</sup> | <i>ZMIZ1</i> <sup>a</sup>                                 |
| 10q24.2  | 101.27 - 101.34           | 0.07               | 101,324.7       | 1.2x10 <sup>-32</sup> | 101,274.6       | 2.3x10 <sup>-02</sup> | <i>NKX2-3</i>                                             |

Table S1 continued

| Chr      | Reported LD Interval (Mb) | Interval Span (Mb) | WTCCC $\hat{S}$ | WTCCC P-value         | NIDDK $\hat{S}$ | NIDDK P-value         | Gene region (WTCCC/NIDDK if different)                  |
|----------|---------------------------|--------------------|-----------------|-----------------------|-----------------|-----------------------|---------------------------------------------------------|
| 11q12.2  | 61.52 - 61.68             | 0.16               | 61,680.2        | 3.4x10 <sup>-02</sup> | -               | -                     | <i>RAB3ILI</i> <sup>a</sup>                             |
| 11q13.1  | 63.82 - 64.29             | 0.47               | 64,027.0        | 5.8x10 <sup>-03</sup> | 64,137.4        | 3.2x10 <sup>-02</sup> | <i>PLCB3</i> <sup>a</sup> / <i>RPS6KA4</i> <sup>a</sup> |
| 11q13.5  | 76.02 - 76.36             | 0.34               | 76,304.4        | 4.4x10 <sup>-10</sup> | -               | -                     | <i>C11orf30</i>                                         |
| 12q12    | 40.13 - 41.02             | 0.89               | 40,598.3        | 3.0x10 <sup>-02</sup> | 40,368.0        | 1.7x10 <sup>-03</sup> | <i>LRRK2/SLC2A13</i> <sup>a</sup>                       |
| 13q14.11 | 42.82 - 43.10             | 0.28               | 43,022.6        | 1.3x10 <sup>-07</sup> | -               | -                     | <i>TNFSF11</i>                                          |
| 13q14.11 | 44.23 - 44.64             | 0.41               | 44,491.1        | 6.6x10 <sup>-12</sup> | 44,607.7        | 3.0x10 <sup>-02</sup> | <i>LACC1/LINC00284</i>                                  |
| 14q24.1  | 69.16 - 69.32             | 0.16               | 69,199.5        | 4.1x10 <sup>-02</sup> | -               | -                     | <i>ZFP36L1</i>                                          |
| 14q31.3  | 88.21 - 88.64             | 0.43               | 88,364.3        | 6.2x10 <sup>-05</sup> | 88,216.2        | 5.1x10 <sup>-03</sup> | <i>GALC</i>                                             |
| 15q22.33 | 67.41 - 67.48             | 0.07               | 67,410.8        | 1.5x10 <sup>-02</sup> | -               | -                     | <i>SMAD3</i> <sup>a</sup>                               |
| 16p11.2  | 28.29 - 29.03             | 0.74               | -               | -                     | 28,940.3        | 4.5x10 <sup>-02</sup> | <i>CD19</i>                                             |
| 16q12.1  | 50.46 - 50.85             | 0.39               | 50,803.2        | 2.6x10 <sup>-15</sup> | 50,803.2        | 1.1x10 <sup>-09</sup> | <i>NOD2</i> <sup>a</sup>                                |
|          |                           |                    | 50,846.3        | 1.6x10 <sup>-13</sup> | 50,846.5        | 4.1x10 <sup>-04</sup> | <i>CYLD</i>                                             |
| 17q12    | 32.49 - 32.68             | 0.19               | -               | -                     | 32,634.2        | 4.1x10 <sup>-02</sup> | <i>CCL8</i>                                             |
| 17q12    | 37.37 - 38.26             | 0.89               | 37,985.9        | 1.1x10 <sup>-03</sup> | 37,888.9        | 4.2x10 <sup>-05</sup> | <i>IKZF3</i> <sup>a</sup> / <i>MIEN1</i>                |
| 17q21.2  | 40.32 - 41.00             | 0.68               | 40,501.5        | 2.0x10 <sup>-18</sup> | -               | -                     | <i>STAT3</i> <sup>a</sup>                               |
| 18p11.21 | 12.74 - 12.93             | 0.19               | 12,875.2        | 2.9x10 <sup>-12</sup> | -               | -                     | <i>PTPN2</i> <sup>a</sup>                               |
| 19p13.3  | 1.09 - 1.18               | 0.09               | 1,127.7         | 2.0x10 <sup>-02</sup> | -               | -                     | <i>SBNO2</i> <sup>a</sup>                               |
| 19p13.2  | 10.40 - 10.64             | 0.24               | 10,560.9        | 1.3x10 <sup>-02</sup> | -               | -                     | <i>PDE4A</i> <sup>a</sup>                               |
| 19q13.11 | 33.73 - 33.78             | 0.05               | -               | -                     | -               | -                     | -                                                       |
| 19q13.33 | 49.09 - 49.28             | 0.19               | -               | -                     | 49,212.0        | 3.6x10 <sup>-04</sup> | <i>FUT2</i>                                             |
| 20q13.33 | 62.18 - 62.48             | 0.30               | 62,327.9        | 2.3x10 <sup>-04</sup> | -               | -                     | <i>RTEL1-TNFRSF6B</i> <sup>a</sup>                      |
| 21q12.1  | 16.70 - 16.85             | 0.15               | 16,841.4        | 4.4x10 <sup>-07</sup> | -               | -                     | <i>USP25</i>                                            |
| 21q11.21 | 21.81 - 22.06             | 0.25               | -               | -                     | -               | -                     | -                                                       |
| 21q22.3  | 45.59 - 45.70             | 0.11               | 45,609.1        | 5.5x10 <sup>-06</sup> | -               | -                     | <i>ICOSLG</i>                                           |
| 22q12.2  | 29.90 - 30.67             | 0.77               | 30,228.8        | 8.0x10 <sup>-07</sup> | -               | -                     | <i>ASCC2</i> <sup>a</sup>                               |
| 22q13.1  | 39.67 - 39.81             | 0.14               | -               | -                     | 39,686.8        | 1.1x10 <sup>-02</sup> | <i>RPL3</i>                                             |

**bold** denotes that the signal is replicated using the data stratified according to Non Jewish Ileal and extra-ileal inflammation; we give the closest gene (up to 300kb) to the  $\hat{S}$ ; <sup>a</sup>at least one of the estimated locations  $\hat{S}$  is located within the identified gene. When  $\hat{S}$  is not within the gene then we give the closest gene (up to 300kb) to the  $\hat{S}$ . All locations in kb are in NCBI 37.

**Table S2: Whole-Genome Association Statistics and the Closest Gene to the Estimated Location of the Causal Agent for the 78 Gene-Regions that Passed Our Genome-Wide Significance Threshold  $1 \times 10^{-5}$  with  $\hat{\delta}$  Locations of 150kb or Less between the 2 Data Sets**

| Chr     | WTCCC $\hat{\delta}$ | NIDDK $\hat{\delta}$ | Gene region (WTCCC/NIDDK if different)                      | Meta-P-value          |
|---------|----------------------|----------------------|-------------------------------------------------------------|-----------------------|
| 1p31.3  | 61,982.8             | 61,938.8             | <i>NFIA</i> <sup>b</sup>                                    | $1.4 \times 10^{-07}$ |
| 1p31.3  | 64,095.1             | 64,005.9             | <i>PGM1a/EFCAB7a</i> <sup>b</sup>                           | $1.1 \times 10^{-08}$ |
| 1q21.3  | 151,788.8            | 151,837.4            | <i>RORC</i> <sup>a</sup> / <i>THEM4</i>                     | $1.2 \times 10^{-09}$ |
| 1q42.2  | 233,765.3            | 233,835.4            | <i>KCNKI</i> <sup>ab</sup>                                  | $5.3 \times 10^{-08}$ |
| 1q43    | 236,709.1            | 236,684.6            | <i>LGALS8</i> <sup>a</sup>                                  | $2.8 \times 10^{-07}$ |
| 1q43    | 236,862.0            | 236,805.4            | <i>ACTN2</i> <sup>a</sup> / <i>HEATR1</i>                   | $1.3 \times 10^{-10}$ |
| 2p25.2  | 6,394.6              | 6,425.5              | <i>LOC400940</i>                                            | $5.1 \times 10^{-09}$ |
| 2p24.2  | 16,442.2             | 16,452.4             | <i>FAM49A</i>                                               | $5.6 \times 10^{-06}$ |
| 2p23.3  | 25,247.9             | 25,138.3             | <i>DNAJC27-AS1</i> <sup>a</sup> / <i>ADCY3</i> <sup>a</sup> | $8.7 \times 10^{-18}$ |
| 2p13.1  | 74,616.6             | 74,659.7             | <i>DCTN1</i> <sup>a</sup> / <i>RTKN</i> <sup>ab</sup>       | $4.9 \times 10^{-22}$ |
| 2q14.1  | 117,951.4            | 117,821.6            | <i>Intergenic</i>                                           | $3.3 \times 10^{-06}$ |
| 2q24.3  | 168,944.1            | 168,810.8            | <i>STK39</i> <sup>a</sup>                                   | $3.3 \times 10^{-07}$ |
| 2q32.1  | 185,889.2            | 185,791.4            | <i>ZNF804A</i> <sup>a</sup>                                 | $7.4 \times 10^{-09}$ |
| 2q34    | 212,427.1            | 212,442.8            | <i>ERBB4</i> <sup>a</sup>                                   | $3.1 \times 10^{-06}$ |
| 3p22.3  | 36,213.9             | 36,097.7             | <i>STAC/ARPP21</i>                                          | $2.6 \times 10^{-09}$ |
| 3p22.2  | 37,598.6             | 37,602.5             | <i>ITGA9</i> <sup>a</sup>                                   | $6.2 \times 10^{-09}$ |
| 3q11.2  | 96,376.9             | 96,304.5             | <i>EPHA6</i> <sup>b</sup>                                   | $6.6 \times 10^{-09}$ |
| 3q12.1  | 99,338.2             | 99,330.9             | <i>COL8A1</i>                                               | $1.2 \times 10^{-07}$ |
| 4p12-11 | 48,197.8             | 48,342.9             | <i>TEC</i> <sup>a</sup> / <i>SLAIN2</i>                     | $3.4 \times 10^{-15}$ |
| 4q12    | 54,551.5             | 54,668.6             | <i>LNX1/RPL21P44</i> <sup>b</sup>                           | $2.7 \times 10^{-06}$ |
| 4q12    | 55,260.5             | 55,241.3             | <i>PDGFRA</i> <sup>b</sup>                                  | $2.9 \times 10^{-09}$ |
| 4q25    | 110,193.1            | 110,128.2            | <i>COL25A1</i> <sup>ab</sup>                                | $6.8 \times 10^{-06}$ |
| 4q35.1  | 186,241.5            | 186,267.1            | <i>SNX25</i> <sup>a</sup>                                   | $5.2 \times 10^{-08}$ |
| 5q22.2  | 112,590.6            | 112,572.4            | <i>MCC</i> <sup>ab</sup>                                    | $8.5 \times 10^{-06}$ |
| 5q23.2  | 126,822.9            | 126,898.0            | <i>MEGF10/PRRC1</i> <sup>b</sup>                            | $5.5 \times 10^{-10}$ |
| 6p22.3  | 24,443.8             | 24,457.3             | <i>GPLD1</i> <sup>a</sup>                                   | $4.0 \times 10^{-07}$ |
| 6p22.1  | 29,605.2             | 29,575.4             | <i>GABBRI</i> <sup>a</sup>                                  | $5.5 \times 10^{-06}$ |
| 6q12    | 65,246.8             | 65,244.5             | <i>EYS</i> <sup>a</sup>                                     | $1.6 \times 10^{-07}$ |
| 6q25.3  | 159,670.8            | 159,794.4            | <i>FNDC1</i> <sup>a</sup>                                   | $1.5 \times 10^{-08}$ |
| 6q27    | 166,505.9            | 166,501.1            | <i>T</i> <sup>b</sup>                                       | $7.0 \times 10^{-07}$ |
| 7p21.1  | 20,044.2             | 19,975.1             | <i>MACC1/TMEM196</i>                                        | $1.9 \times 10^{-07}$ |
| 7p15.3  | 24,175.9             | 24,271.9             | <i>NPY</i> <sup>b</sup>                                     | $3.9 \times 10^{-07}$ |
| 7p14.1  | 41,898.3             | 41,939.6             | <i>INHBA-AS1/GLI3</i>                                       | $2.1 \times 10^{-06}$ |
| 7q21.11 | 80,401.5             | 80,470.9             | <i>SEMA3C</i> <sup>a</sup>                                  | $4.8 \times 10^{-06}$ |
| 7q31.31 | 120,409.2            | 120,337.3            | <i>TSPAN12/KCND2</i> <sup>a</sup>                           | $8.7 \times 10^{-06}$ |
| 7q31.33 | 125,266.9            | 125,219.7            | <i>Intergenic</i> <sup>b</sup>                              | $3.7 \times 10^{-10}$ |

Table S2 continued

| Chr      | WTCCC $\hat{S}$ | NIDDK $\hat{S}$ | Gene region (WTCCC/NIDDK if different)    | Meta-P-value          |
|----------|-----------------|-----------------|-------------------------------------------|-----------------------|
| 7q32.3   | 131,467.2       | 131,394.6       | <i>PODXL</i> <sup>b</sup>                 | 7.8x10 <sup>-07</sup> |
| 8p22     | 17,632.9        | 17,635.3        | <i>MTUS1</i> <sup>a</sup>                 | 5.5x10 <sup>-07</sup> |
| 8q12.1   | 57,504.1        | 57,507.6        | <i>LOC100507632</i>                       | 5.2x10 <sup>-06</sup> |
| 8q21.13  | 80,385.0        | 80,277.0        | <i>STMN2</i> <sup>b</sup>                 | 1.3x10 <sup>-12</sup> |
| 8q21.13  | 83,670.2        | 83,786.5        | <i>intergenic</i>                         | 1.9x10 <sup>-08</sup> |
| 8q22.3   | 104,465.6       | 104,363.8       | <i>DCAF13/FZD6</i> <sup>b</sup>           | 4.4x10 <sup>-06</sup> |
| 8q23.3   | 114,908.3       | 114,815.4       | <i>intergenic</i> <sup>b</sup>            | 4.9x10 <sup>-11</sup> |
| 9p24.3   | 396.8           | 468.1           | <i>DOCK8</i> <sup>ab</sup>                | 2.6x10 <sup>-07</sup> |
| 10p12.1  | 25,571.8        | 25,686.6        | <i>GPR158</i> <sup>ab</sup>               | 1.5x10 <sup>-09</sup> |
| 10q21.1  | 61,019.5        | 61,135.2        | <i>FAM13C</i> <sup>a</sup>                | 2.2x10 <sup>-06</sup> |
| 10q21.2  | 63,604.2        | 63,553.3        | <i>ARID5B/C10orf107</i>                   | 7.3x10 <sup>-09</sup> |
| 10q22.2  | 75,697.5        | 75,698.5        | <i>PLAU</i> <sup>b</sup>                  | 2.6x10 <sup>-13</sup> |
| 10q22.3  | 79,392.4        | 79,247.9        | <i>KCNMA1</i> <sup>a</sup>                | 2.5x10 <sup>-06</sup> |
| 10q25.1  | 111,613.9       | 111,622.3       | <i>XPNPEP1</i>                            | 1.8x10 <sup>-06</sup> |
| 10q25.3  | 115,370.8       | 115,381.2       | <i>NRAP</i> <sup>a</sup>                  | 1.0x10 <sup>-05</sup> |
| 11p15.4  | 5,785.5         | 5,836.4         | <i>OR52N4/OR52N2</i> <sup>b</sup>         | 3.3x10 <sup>-10</sup> |
| 11p14.1  | 27,827.8        | 27,790.8        | <i>BDNF</i>                               | 8.2x10 <sup>-07</sup> |
| 11q12.1  | 56,626.0        | 56,625.0        | <i>OR9G4</i>                              | 1.0x10 <sup>-05</sup> |
| 11q24.2  | 126,774.5       | 126,749.9       | <i>KIRREL3</i> <sup>a</sup>               | 1.1x10 <sup>-06</sup> |
| 12p11.22 | 28,744.2        | 28,741.7        | <i>CCDC91</i> <sup>b</sup>                | 1.1x10 <sup>-06</sup> |
| 12q12    | 44,676.8        | 44,823.7        | <i>TMEM117</i> <sup>ab</sup>              | 2.4x10 <sup>-06</sup> |
| 12q22    | 92,998.8        | 93,090.8        | <i>C12orf74</i> <sup>b</sup>              | 7.6x10 <sup>-09</sup> |
| 12q23.1  | 101,350.2       | 101,350.1       | <i>ANO4</i> <sup>a</sup>                  | 9.3x10 <sup>-06</sup> |
| 13q14.3  | 52,081.3        | 52,078.0        | <i>MIR4703</i>                            | 8.9x10 <sup>-08</sup> |
| 14q21.1  | 39,671.6        | 39,601.9        | <i>PNN/GEMIN2</i> <sup>ab</sup>           | 6.4x10 <sup>-07</sup> |
| 14q31.1  | 80,015.5        | 80,139.6        | <i>NRXN3</i> <sup>ab</sup>                | 7.6x10 <sup>-07</sup> |
| 15q13.3  | 31,839.1        | 31,737.8        | <i>OTUD7A</i> <sup>a</sup>                | 1.0x10 <sup>-08</sup> |
| 15q14    | 34,414.0        | 34,291.8        | <i>PGBD4/CHRM5</i> <sup>a</sup>           | 8.9x10 <sup>-06</sup> |
| 16p13.3  | 7,262.9         | 7,200.6         | <i>RBFOX1</i> <sup>b</sup>                | 1.0x10 <sup>-05</sup> |
| 16p13.3  | 7,272.8         | 7,391.8         | <i>RBFOX1</i> <sup>a</sup>                | 3.6x10 <sup>-06</sup> |
| 16q12.1  | 50,417.0        | 50,417.2        | <i>BRD7</i>                               | 2.0x10 <sup>-08</sup> |
| 16q22.1  | 67,464.1        | 67,422.7        | <i>HSD11B2</i> <sup>b</sup>               | 7.5x10 <sup>-08</sup> |
| 16q24.1  | 85,982.3        | 85,958.0        | <i>IRF8</i>                               | 1.5x10 <sup>-08</sup> |
| 17q25.1  | 73,344.9        | 73,411.5        | <i>GRB2</i> <sup>a</sup> / <i>MIR3678</i> | 4.3x10 <sup>-14</sup> |
| 18q11.2  | 19,677.2        | 19,620.4        | <i>GATA6</i>                              | 2.6x10 <sup>-07</sup> |
| 18q12.3  | 40,517.4        | 40,666.0        | <i>RIT2</i> <sup>ab</sup>                 | 6.0x10 <sup>-18</sup> |
| 18q21.1  | 44,940.9        | 44,800.7        | <i>IER3IP1</i> <sup>b</sup>               | 7.8x10 <sup>-06</sup> |
| 20p12.3  | 7,901.0         | 7,878.5         | <i>HAO1</i> <sup>ab</sup>                 | 1.4x10 <sup>-07</sup> |
| 20q12    | 37,960.3        | 38,106.0        | <i>LOC339568</i>                          | 3.9x10 <sup>-06</sup> |

**Table S2 continued**

| Chr      | WTCCC $\hat{S}$ | NIDDK $\hat{S}$ | Gene region (WTCCC/NIDDK if different)   | Meta-P-value          |
|----------|-----------------|-----------------|------------------------------------------|-----------------------|
| 20q13.12 | 44,741.5        | 44,672.0        | <b><i>CD40/SLC12A5</i></b> <sup>ab</sup> | 7.7x10 <sup>-08</sup> |
| 22q12.3  | 37,325.9        | 37,349.3        | <i>CSF2RB<sup>a</sup>/LOC1005006241</i>  | 2.6x10 <sup>-08</sup> |
| Xq28     | 147,228.4       | 147,114.7       | <i>FMR1NB</i>                            | 4.4x10 <sup>-07</sup> |

**bold** denotes that the signal is replicated using the data stratified according to Non Jewish Ileal and extra-ileal inflammation; <sup>a</sup>at least one of the estimated locations  $\hat{S}$  is located within the identified gene; <sup>b</sup>the signal is significant in the Pooled NIDDK data as well as the stratified Non Jewish Ileal and extra-ileal dataset. When  $\hat{S}$  is not within the gene then we give the closest gene (up to 300kb) to the  $\hat{S}$ . All locations in kb are in NCBI 37.

**Table S3: Whole-Genome Association Statistics and the Closest Gene to the Estimated Location of the Causal Agent for the 56 Gene-Regions with p Values  $10^{-3}$ - $10^{-5}$  and with  $\hat{S}$  Locations of 80 kb or Less between the 2 Data Sets**

| Chr     | WTCCC $\hat{S}$ | NIDDK $\hat{S}$ | Gene region (WTCCC/NIDDK if different) | Meta-P-value          |
|---------|-----------------|-----------------|----------------------------------------|-----------------------|
| 1p34.1  | 45,764.3        | 45,764.4        | <i>LOC400752</i>                       | $3.6 \times 10^{-04}$ |
| 1p32.2  | 58,535.6        | 58,575.4        | <i>DABI</i> <sup>a</sup>               | $2.7 \times 10^{-04}$ |
| 1p31.3  | 68,056.4        | 68,072.2        | <i>GADD45A</i>                         | $2.9 \times 10^{-05}$ |
| 1p31.1  | 83,125.7        | 83054.7         | <i>intergenic</i>                      | $1.4 \times 10^{-04}$ |
| 1q31.3  | 194,273.4       | 194,332.3       | <i>intergenic</i> <sup>b</sup>         | $2.2 \times 10^{-04}$ |
| 1q32.1  | 204,129.7       | 204,143.0       | <i>REN</i> <sup>a</sup>                | $3.4 \times 10^{-04}$ |
| 1q42.12 | 225,508.2       | 225,554.8       | <i>DNAH14</i> <sup>a</sup>             | $3.0 \times 10^{-05}$ |
| 1q42.12 | 226,248.8       | 226,249.4       | <i>H3F3A</i> <sup>b</sup>              | $9.1 \times 10^{-04}$ |
| 2p14    | 67,869.6        | 67,871.1        | <i>ETAA1</i> <sup>b</sup>              | $2.1 \times 10^{-05}$ |
| 2q11.2  | 102,625.1       | 102,625.1       | <i>IL1R2</i> <sup>a</sup>              | $4.9 \times 10^{-04}$ |
| 2q31.1  | 170,038.8       | 170,037.2       | <i>LRP2</i> <sup>a</sup>               | $8.4 \times 10^{-04}$ |
| 2q36.3  | 226,258.2       | 226,258.4       | <i>NYAP2</i>                           | $1.2 \times 10^{-05}$ |
| 3p14.3  | 55,192.0        | 55,115.1        | <i>CACNA2D3</i>                        | $5.7 \times 10^{-05}$ |
| 3p12.3  | 77,377.2        | 77,377.3        | <i>ROBO2</i> <sup>a</sup>              | $8.2 \times 10^{-04}$ |
| 3q13.2  | 112,181.4       | 112,184.1       | <i>BTLA</i> <sup>a</sup>               | $2.9 \times 10^{-05}$ |
| 3q24    | 148,459.5       | 148,419.7       | <i>AGTR1</i> <sup>a</sup>              | $2.1 \times 10^{-04}$ |
| 4p15.33 | 13,075.6        | 13,050.3        | <i>HSP90AB2</i> <sup>b</sup>           | $1.5 \times 10^{-04}$ |
| 4q13.2  | 67,799.9        | 67,792.9        | <i>intergenic</i>                      | $8.2 \times 10^{-04}$ |
| 4q27    | 121,797.6       | 121872.1        | <i>PRDM5</i> <sup>a</sup>              | $2.1 \times 10^{-05}$ |
| 5p14.3  | 23,042.2        | 23,002.6        | <i>CDH12</i>                           | $3.9 \times 10^{-05}$ |
| 5q21.1  | 100,970.9       | 100,970.8       | <i>intergenic</i>                      | $6.0 \times 10^{-04}$ |
| 5q33.3  | 156,594.7       | 156,627.7       | <i>FAM71B/ITK</i> <sup>ab</sup>        | $8.2 \times 10^{-05}$ |
| 6p22.3  | 21,462.0        | 21,467.8        | <i>SOX4</i>                            | $5.6 \times 10^{-04}$ |
| 6q21    | 107,433.4       | 107,473.5       | <i>BEND3</i> <sup>a</sup>              | $3.6 \times 10^{-05}$ |
| 6q21    | 113,971.2       | 113,977.4       | <i>MARCKS</i>                          | $7.1 \times 10^{-05}$ |
| 6q22.31 | 125,214.4       | 125,215.3       | <i>STL</i> <sup>b</sup>                | $3.0 \times 10^{-04}$ |
| 6q23.3  | 137,546.9       | 137,565.2       | <i>IFNGR1</i>                          | $3.5 \times 10^{-04}$ |
| 6q25.3  | 156,152.9       | 156,190.7       | <i>intergenic</i>                      | $1.9 \times 10^{-04}$ |
| 6q25.3  | 158,344.5       | 158,365.2       | <i>SNX9</i> <sup>ab</sup>              | $3.1 \times 10^{-04}$ |
| 7p21.1  | 20,286.7        | 20,301.2        | <i>MACC1</i>                           | $5.5 \times 10^{-05}$ |
| 7p14.3  | 34,739.3        | 34,757.7        | <i>NPSRI</i> <sup>a</sup>              | $3.2 \times 10^{-04}$ |
| 7q31.32 | 122,995.2       | 122,993.0       | <i>IQUB</i> <sup>b</sup>               | $1.6 \times 10^{-04}$ |
| 7q34    | 142,653.2       | 142,650.9       | <i>KEL</i> <sup>a</sup>                | $1.1 \times 10^{-04}$ |
| 8q24.22 | 134,050.4       | 134,063.7       | <i>SLA</i> <sup>a</sup>                | $1.5 \times 10^{-04}$ |
| 9q21.13 | 74,603.0        | 74678.4         | <i>C9orf85/C9orf57</i>                 | $7.7 \times 10^{-4}$  |
| 9q21.2  | 80,206.6        | 80,206.7        | <i>GNAI4</i> <sup>ab</sup>             | $2.7 \times 10^{-04}$ |
| 9q33.1  | 121,364.8       | 121,365.0       | <i>intergenic</i>                      | $5.1 \times 10^{-04}$ |

**Table S3 continued**

| Chr      | WTCCC $\hat{S}$ | NIDDK $\hat{S}$ | Gene region (WTCCC/NIDDK if different) | Meta-P-value          |
|----------|-----------------|-----------------|----------------------------------------|-----------------------|
| 10q23.31 | 90,787.7        | 90,787.7        | <i>FAS</i> <sup>b</sup>                | 2.7x10 <sup>-04</sup> |
| 11p15.5  | 1,539.0         | 1,539.0         | <i>MOB2</i> <sup>a</sup>               | 2.1x10 <sup>-04</sup> |
| 11p15.3  | 12,387.3        | 12,331.6        | <i>MICALCL</i> <sup>a</sup>            | 5.1x10 <sup>-05</sup> |
| 12q14.3  | 67,645.2        | 67,640.5        | <i>CAND1</i>                           | 6.9x10 <sup>-04</sup> |
| 12q21.32 | 89,154.8        | 89,148.0        | <i>KITLG</i> <sup>b</sup>              | 5.7x10 <sup>-05</sup> |
| 12q24.32 | 126,746.8       | 126,753.9       | <i>LOC100128554</i> <sup>b</sup>       | 9.9x10 <sup>-04</sup> |
| 13q12.13 | 27,389.5        | 27,391.1        | <i>GPR12</i>                           | 1.3x10 <sup>-04</sup> |
| 13q13.3  | 36,090.9        | 36,159.4        | <i>NBEA</i> <sup>a</sup>               | 2.7x10 <sup>-04</sup> |
| 13q31.3  | 90,018.8        | 90,018.6        | <i>intergenic</i>                      | 7.5x10 <sup>-04</sup> |
| 13q31.3  | 90,206.6        | 90,176.3        | <i>intergenic</i>                      | 6.9x10 <sup>-04</sup> |
| 14q31.1  | 82,444.3        | 82,452.3        | <i>intergenic</i> <sup>b</sup>         | 5.4x10 <sup>-05</sup> |
| 15q21.2  | 50,193.4        | 50,171.3        | <i>ATP8B4</i> <sup>a</sup>             | 8.8x10 <sup>-04</sup> |
| 16q21    | 61,777.3        | 61,777.1        | <i>CDH8</i> <sup>a</sup>               | 1.4x10 <sup>-05</sup> |
| 16q23.1  | 76,295.6        | 76,275.6        | <i>CNTNAP4</i>                         | 9.1x10 <sup>-04</sup> |
| 16q23.1  | 78,458.5        | 78,410.4        | <i>WWOX</i> <sup>ab</sup>              | 6.6x10 <sup>-04</sup> |
| 20p21.1  | 15,802.7        | 15,876.4        | <i>MACROD2</i> <sup>a</sup>            | 7.1x10 <sup>-04</sup> |
| 21q22.2  | 41,532.5        | 41,513.2        | <i>DSCAM</i> <sup>a</sup>              | 7.3x10 <sup>-04</sup> |
| 22q12.3  | 35,540.3        | 35,540.4        | <i>ISX</i> <sup>b</sup>                | 2.8x10 <sup>-04</sup> |
| Xq23     | 115,981.3       | 115,966.6       | <i>intergenic</i>                      | 7.3x10 <sup>-05</sup> |

**bold** denotes that the signal is replicated using the data stratified according to Non Jewish Ileal and extra-ileal inflammation; <sup>a</sup>at least one of the estimated locations  $\hat{S}$  is located within the identified gene; <sup>b</sup>the signal is significant in the Pooled NIDDK data as well as the stratified Non Jewish Ileal and extra-ileal dataset. When  $\hat{S}$  is not within the gene then we give the closest gene (up to 300kb) to the  $\hat{S}$ . All locations in kb are in NCBI 37.



**Table S4. GO Analysis for the Genes in Tables S1, S2, and S3**

| GO-ID | Corrected P-value      | x   | n    | GO ID Description                | Genes in test set                                                                                                                                                                                                                                                                                                                                                                                                                                                                                                                                                                                                                                                                                                                                                                                                 |
|-------|------------------------|-----|------|----------------------------------|-------------------------------------------------------------------------------------------------------------------------------------------------------------------------------------------------------------------------------------------------------------------------------------------------------------------------------------------------------------------------------------------------------------------------------------------------------------------------------------------------------------------------------------------------------------------------------------------------------------------------------------------------------------------------------------------------------------------------------------------------------------------------------------------------------------------|
| 4871  | 9.6 x10 <sup>-06</sup> | 48  | 2128 | Signal transducer activity       | <i>GNAI4, IL1R2, CD244, ERBB4, GRB2, GABBR1, CCL8, RORC, SLA, OR52N2, AGTR1, PLCL1, PLCB3, OR52N4, CSF2RB, SEMA3C, ROBO2, STK39, NPSR1, FAS, IFNGR1, TEC, GPR158, IL18RAP, IL23R, PTGER4, NRXN3, IL1RL1, SNX25, NDFIP1, SMAD3, OR9G4, ACTN2, CD40, STAT3, FZD6, BTLA, ITGA9, CHRM5, TNFSF11, EPHA6, CD19, NPY, PDGFRA, MCC, IL12B, LRP2, GPR12</i>                                                                                                                                                                                                                                                                                                                                                                                                                                                                |
| 4872  | 1.8 x10 <sup>-03</sup> | 35  | 1686 | Receptor activity                | <i>IL1R2, CD244, ERBB4, GABBR1, RORC, OR52N2, AGTR1, OR52N4, CSF2RB, SEMA3C, ROBO2, NPSR1, FAS, IFNGR1, TEC, GPR158, IL18RAP, IL23R, PTGER4, NRXN3, IL1RL1, OR9G4, CD40, FZD6, BTLA, ITGA9, CHRM5, EPHA6, TNFSF11, NPY, PDGFRA, MCC, IL12B, LRP2, GPR12</i>                                                                                                                                                                                                                                                                                                                                                                                                                                                                                                                                                       |
| 5515  | 1.9 x10 <sup>-03</sup> | 111 | 8119 | Protein binding                  | <i>ADCY3, TNFSF15, TNFSF18, LNX1, PNN, AGTR1, BDNF, PRKAR2A, DAB1, GATA6, PDE4A, RLN2, STK39, ROBO2, FAS, WWOX, DSCAM, MAGI3, KCND2, STMN2, ACTN2, CD40, DCTN1, SP140, FGFR1OP, PRDM5, PDGFRA, LRRK2, IL1R2, SNX9, CAMTA1, ERBB4, MOB2, PFKFB3, GRB2, KEL, ITLN2, SOX4, CCL8, CCDC91, POMC, T, RPL3, TEC, ITK, IKZF3, IL1RL1, PTPN2, PODXL, NDFIP1, SMAD3, HEATR1, DOCK8, BTLA, EPHA6, TNFSF11, NPY, MARCKS, RIT2, ATG16L1, E2F3, GABBR1, NBEA, GLI3, SLA, LNPEP, NOD2, PLCB3, CCNY, BRD7, SLC22A4, SEMA3C, CSF2RB, IFNGR1, KIRREL3, KCNMA1, CNTNAP4, RAB3IL1, COL25A1, ZMIZ1, CAND1, MCC, IL12B, GADD45A, ICOSLG, CD244, KITLG, RTKN, ZNF365, MACC1, TRIB1, ZFP36L1, CYLD, RNF123, REN, GEMIN2, SLC12A5, SNX25, XPNPEP1, STAT3, FZD6, MICALCL, ANKRD44, RPS6KA4, CD19, NRAP, IRF8, IFT172, LRP2, NFIA, RBM17</i> |
| 6928  | 2.0 x10 <sup>-03</sup> | 15  | 474  | Cellular component movement      | <i>NRXN3, ARID5B, PODXL, KITLG, GLI3, STAT3, AGTR1, BDNF, DAB1, TNFSF11, NPY, SEMA3C, ROBO2, IL12B, NKX2-3</i>                                                                                                                                                                                                                                                                                                                                                                                                                                                                                                                                                                                                                                                                                                    |
| 50896 | 2.2 x10 <sup>-03</sup> | 59  | 3631 | Response to stimulus             | <i>ADCY3, TNFSF15, GABBR1, TNFSF18, AGTR1, NOD2, BDNF, PRKAR2A, STAC, GATA6, PDE4A, SEMA3C, STK39, ROBO2, FAS, IFNGR1, DSCAM, KCNMA1, SATB1, IL18RAP, PTGER4, C11ORF30, IRGM, CD40, SP140, HAO1, PDGFRA, HSD11B2, IL12B, LRRK2, GADD45A, ICOSLG, IL1R2, SBNO2, ERBB4, GRB2, CCL8, TRIB1, OR52N2, PLCL1, OR52N4, REN, NKX2-3, TEC, ITK, IL23R, IL1RL1, PTPN2, SMAD3, OR9G4, KCNK1, STAT3, CD19, EYS, TNFSF11, NPY, IRF8, ATG16L1, PLAU</i>                                                                                                                                                                                                                                                                                                                                                                         |
| 16020 | 2.5 x10 <sup>-03</sup> | 100 | 7251 | Membrane                         | <i>ADCY3, GNAI4, TNFSF15, MEGF10, TNFSF18, PNN, AGTR1, PRKAR2A, DAB1, PDE4A, C2ORF74, STK39, ROBO2, NPSR1, FAS, MTUS1, DSCAM, MAGI3, KCND2, STMN2, SLC22A23, ACTN2, CD40, PDGFRA, LRRK2, IL1R2, SLC2A13, SNX9, ERBB4, GRB2, KEL, CCDC91, OR52N2, OR52N4, TMEM196, ITK, GPR158, IL23R, IL1RL1, PODXL, NDFIP1, SMAD3, KCNK1, CACNA2D3, BTLA, ITGA9, TMEM117, EPHA6, TNFSF11, MARCKS, RIT2, ATG16L1, PLAU, IER3IP1, GABBR1, NBEA, LNPEP, TSPAN12, NOD2, PLCB3, TMEM174, CCNY, SLC22A4, SEMA3C, CSF2RB, ANO4, IFNGR1, ATP8B4, KIRREL3, KCNMA1, IL18RAP, CNTNAP4, PTGER4, FMR1NB, NRXN3, IRGM, COL25A1, CHRM5, MCC, IL12B, THEM4, GPR12, ICOSLG, C9ORF57, CD244, KITLG, CDKAL1, CDH8, CYLD, REN, FUT2, SLC12A5, OR9G4, STAT3, FZD6, CDH12, CD19, NRAP, LRP2, NFIA</i>                                                  |
| 7610  | 3.2 x10 <sup>-03</sup> | 14  | 466  | Behavior                         | <i>ADCY3, KCNMA1, CCL8, STAT3, AGTR1, PLCL1, BDNF, TNFSF11, NPY, REN, ROBO2, PLAU, DSCAM, TEC</i>                                                                                                                                                                                                                                                                                                                                                                                                                                                                                                                                                                                                                                                                                                                 |
| 32501 | 1.3 x10 <sup>-02</sup> | 64  | 4373 | Multicellular organismal process | <i>ADCY3, GABBR1, GLI3, AGTR1, TSPAN12, NOD2, BDNF, OLFML3, DAB1, GATA6, SLC22A4, CSF2RB, SEMA3C, ROBO2, IFNGR1, WWOX, KIRREL3, DSCAM, KCNMA1, SATB1, KCND2, NRXN3, STMN2, ARID5B, ACTN2, CD40, DCTN1, CHRM5, ZMIZ1, PDGFRA, HSD11B2, PRDM1, IL12B, LRRK2, ERBB4, GRB2, KEL, KITLG, SOX4, POMC, ZFP36L1, OR52N2, T, OR52N4, REN, COL8A1, NKX23, TEC, IKZF3, PODXL, SLC12A5, SMAD3, OR9G4, STAT3, FZD6, MICALCL, EYS, TNFSF11, NPY, IRF8, IFT172, RIT2, LRP2, PLAU</i>                                                                                                                                                                                                                                                                                                                                             |
| 30154 | 1.4 x10 <sup>-02</sup> | 30  | 1666 | Cell differentiation             | <i>GRB2, GABBR1, KITLG, SOX4, GLI3, ZFP36L1, T, BDNF, DAB1, GATA6, REN, SEMA3C, ROBO2, WWOX, NKX23, DSCAM, KCNMA1, SATB1, STMN2, NRXN3, SMAD3, STAT3, MICALCL, TNFSF11, ZMIZ1, IRF8, PDGFRA, CAND1, IL12B, PRDM1</i>                                                                                                                                                                                                                                                                                                                                                                                                                                                                                                                                                                                              |
| 50789 | 1.4 x10 <sup>-02</sup> | 88  | 6550 | Regulation of biological process | <i>ISX, ADCY3, GNAI4, E2F3, GABBR1, TNFSF15, RORC, GLI3, TNFSF18, SLA, PNN, TSPAN12, AGTR1, BDNF, NOD2, PRKAR2A, DAB1, STAC, GATA6, PDE4A, CCNY, BRD7, CSF2RB, ROBO2, STK39, FAS, IFNGR1, WWOX, DSCAM, KCNMA1, SATB1, IL18RAP, PTGER4, CNTNAP4, STMN2, C11ORF30, ARID5B, SNAPC4, ACTN2, CD40, PPM1G, CHRM5, ASCC2, ZMIZ1, FGFR1OP, PRDM5, PDGFRA, MCC, CAND1, PRDM1, IL12B, LRRK2, GADD45A, ICOSLG, CD244, SBNO2, ERBB4, GRB2, ITLN2, KITLG, CCL8, SOX4, RTKN, POMC, MACC1, TRIB1, ZFP36L1, T, CYLD, REN, TEC, NKX2-3, ITK, IKZF3, IL1RL1, PODXL, NDFIP1, SMAD3, STAT3, BTLA, TNFSF11, CD19, RPS6KA4, NPY, IRF8, RIT2, NFIA, PLAU</i>                                                                                                                                                                             |
| 9986  | 1.5 x10 <sup>-02</sup> | 10  | 340  | Cell surface                     | <i>KCNMA1, BTLA, CD244, NOD2, KCND2, CD19, IL1RL1, ROBO2, CD40, PLAU</i>                                                                                                                                                                                                                                                                                                                                                                                                                                                                                                                                                                                                                                                                                                                                          |

Table S4 continued

| GO-ID | Corrected P-value      | x   | n     | GO ID Description                    | Genes in test set                                                                                                                                                                                                                                                                                                                                                                                                                                                                                                                                                                                                                                                                                                                                                                                                                                                                                                                                                                                                                                                                                                                                                                                                                                                                                                                           |
|-------|------------------------|-----|-------|--------------------------------------|---------------------------------------------------------------------------------------------------------------------------------------------------------------------------------------------------------------------------------------------------------------------------------------------------------------------------------------------------------------------------------------------------------------------------------------------------------------------------------------------------------------------------------------------------------------------------------------------------------------------------------------------------------------------------------------------------------------------------------------------------------------------------------------------------------------------------------------------------------------------------------------------------------------------------------------------------------------------------------------------------------------------------------------------------------------------------------------------------------------------------------------------------------------------------------------------------------------------------------------------------------------------------------------------------------------------------------------------|
| 5488  | 1.5 x10 <sup>-02</sup> | 147 | 12360 | Binding                              | <i>ADCY3, GNAI4, TNFSF15, RORC, TNFSF18, LNX1, PNN, AGTR1, BDNF, PRKAR2A, DAB1, STAC, GATA6, PDE4A, RLN2, STK39, ROBO2, NPSR1, FAS, WWOX, DSCAM, SATB1, MAGI3, KCND2, STMN2, ACTN2, CD40, DCTN1, SP140, FGFR1OP, PRDM5, PGM1, PDGFRA, HSD11B2, PRDM1, LRRK2, IL1R2, SNX9, CAMTA1, EFCAB7, ARPP21, MOB2, ERBB4, PFKFB3, DNAH14, GRB2, KEL, ITLN2, SOX4, CCL8, CCDC91, POMC, T, GALC, RPL3, OTUD7A, TEC, NKX2-3, ITK, IKZF3, PTPN2, IL1RL1, PODXL, NDFIP1, SMAD3, LGALS8, HEATR1, DOCK8, CACNA2D3, BTLA, TNFSF11, EPHA6, NPY, H3F3A, MARCKS, RIT2, ATG16L1, ISX, E2F3, GABBR1, NBEA, GLI3, THADA, SLA, LNPEP, PLCB3, NOD2, CCNY, BRD7, SLC22A4, CSF2RB, SEMA3C, IPMK, IFNGR1, KIRREL3, ATP8B4, KCNMA1, CNTNAP4, NRXN3, ARID5B, IRGM, SNAPC4, RAB31L1, COL25A1, HAO1, PPM1G, CHRM5, ZMIZ1, MCC, CAND1, IL12B, GADD45A, ICOSLG, CD244, KITLG, RTKN, ZNF365, CDKALI, MACC1, TRIB1, CDH8, ZFP36L1, CYLD, PLCL1, RNF123, REN, RNASET2, KIF21B, ZNF804A, GEMIN2, SLC12A5, SNX25, XPNPEP1, STAT3, FZD6, CDH12, MICALCL, ANKRD44, CD19, RPS6KA4, EYS, NRAP, IRF8, IFT172, LRP2, NFIA, RBM17</i>                                                                                                                                                                                                                                                       |
| 7275  | 1.5 x10 <sup>-02</sup> | 46  | 2970  | Multicellular organismal development | <i>ERBB4, GRB2, KEL, GABBR1, KITLG, SOX4, GLI3, ZFP36L1, TSPAN12, T, AGTR1, BDNF, OLFML3, DAB1, GATA6, REN, SEMA3C, ROBO2, COL8A1, WWOX, KIRREL3, TEC, DSCAM, NKX23, KCNMA1, SATB1, IKZF3, NRXN3, STMN2, ARID5B, PODXL, SMAD3, DCTN1, STAT3, FZD6, MICALCL, TNFSF11, ZMIZ1, IRF8, IFT172, PDGFRA, PRDM1, IL12B, LRRK2, LRP2, PLAU</i>                                                                                                                                                                                                                                                                                                                                                                                                                                                                                                                                                                                                                                                                                                                                                                                                                                                                                                                                                                                                       |
| 9987  | 1.5 x10 <sup>-02</sup> | 117 | 9366  | Cellular process                     | <i>ADCY3, GNAI4, TNFSF15, MEGF10, TNFSF18, LNX1, PNN, AGTR1, BDNF, PRKAR2A, DAB1, STAC, GATA6, PDE4A, STK39, ROBO2, FAS, WWOX, DSCAM, SATB1, MAGI3, KCND2, C11ORF30, STMN2, SLC22A23, ACTN2, CD40, DCTN1, FGFR1OP, PRDM5, PGM1, PDGFRA, HSD11B2, PRDM1, LRRK2, SLC2A13, SNX9, ERBB4, PFKFB3, DNAH14, GRB2, SOX4, CCL8, POMC, T, RPL3, GALC, NKX23, TEC, ITK, PTPN2, PODXL, NDFIP1, SMAD3, HEATR1, ITGA9, EPHA6, TNFSF11, NPY, H3F3A, RIT2, ATG16L1, E2F3, GPLD1, GABBR1, GLI3, SLA, LNPEP, DCAF13, PLCB3, CCNY, SLC22A4, SEMA3C, ATP8B4, KCNMA1, CNTNAP4, NRXN3, SNAPC4, IRGM, ARID5B, HAO1, PPM1G, CHRM5, ZMIZ1, CAND1, IL12B, USP25, GADD45A, ICOSLG, GPR12, SBNO2, KITLG, RTKN, CDKALI, TRIB1, CDH8, ZFP36L1, CYLD, REN, RNASET2, FUT2, COL8A1, KIF21B, GEMIN2, SLC12A5, SNX25, XPNPEP1, STAT3, CDH12, MICALCL, RPS6KA4, NRAP, IRF8, IFT172, LRP2, NFIA, RBM17</i>                                                                                                                                                                                                                                                                                                                                                                                                                                                                       |
| 7154  | 1.9 x10 <sup>-02</sup> | 17  | 812   | Cell communication                   | <i>KCNMA1, SNX9, KCND2, NRXN3, GRB2, SLC12A5, SNX25, CCL8, POMC, TNFSF18, LNPEP, CHRM5, BDNF, NPY, ROBO2, RIT2, ATG16L1</i>                                                                                                                                                                                                                                                                                                                                                                                                                                                                                                                                                                                                                                                                                                                                                                                                                                                                                                                                                                                                                                                                                                                                                                                                                 |
| 5623  | 2.5 x10 <sup>-02</sup> | 170 | 15040 | Cell                                 | <i>ADCY3, GNAI4, TNFSF15, RORC, MEGF10, TNFSF18, LNX1, PNN, AGTR1, BDNF, FAM49A, PRKAR2A, DAB1, STAC, GATA6, PDE4A, C2ORF74, STK39, ROBO2, NPSR1, FAS, MTUS1, WWOX, DSCAM, SATB1, MAGI3, KCND2, STMN2, C11ORF30, SLC22A23, ACTN2, CD40, SP140, DCTN1, FGFR1OP, PGM1, PRDM5, PDGFRA, HSD11B2, PRDM1, LRRK2, CAMTA1, SNX9, SLC2A13, IL1R2, ARPP21, MOB2, ERBB4, GRB2, PFKFB3, DNAH14, KEL, SOX4, CCDC91, PRRC1, POMC, OR52N2, T, OR52N4, GALC, RPL3, OTUD7A, TMEM196, TEC, NKX23, ITK, GPR158, IKZF3, IL23R, PTPN2, IL1RL1, PODXL, NDFIP1, SMAD3, LGALS8, HEATR1, CACNA2D3, KCNK1, BTLA, ITGA9, TMEM117, TNFSF11, EPHA6, NPY, H3F3A, MARCKS, RIT2, ATG16L1, PLAU, ISX, E2F3, IER3IP1, GABBR1, NBEA, GLI3, SLA, LNPEP, DCAF13, TSPAN12, PLCB3, NOD2, TMEM174, CCNY, SLC22A4, BRD7, CSF2RB, SEMA3C, ETAA1, ANO4, IPMK, IFNGR1, KIRREL3, ATP8B4, KCNMA1, IL18RAP, PTGER4, CNTNAP4, NRXN3, FMR1NB, ARID5B, IRGM, SNAPC4, COL25A1, HAO1, PPM1G, CHRM5, ZMIZ1, SDCCAG3, MCC, CAND1, IL12B, THEM4, USP25, GADD45A, ICOSLG, GPR12, CD244, C9ORF57, KITLG, RTKN, ZNF365, CDKALI, MACC1, TRIB1, CDH8, ZFP36L1, CYLD, PLCL1, RNF123, REN, FAM71B, FUT2, KIF21B, ZNF804A, GEMIN2, SLC12A5, OR9G4, XPNPEP1, STAT3, FZD6, CDH12, MICALCL, CD19, RPS6KA4, NRAP, IRF8, IFT172, LRP2, NFIA, RBM17</i>                                                          |
| 30528 | 4.6 x10 <sup>-02</sup> | 25  | 1507  | Transcription regulator activity     | <i>ISX, CAMTA1, E2F3, SBNO2, RORC, SOX4, GLI3, ZFP36L1, T, GATA6, NKX23, TEC, SATB1, IKZF3, SNAPC4, ARID5B, SMAD3, ACTN2, STAT3, SP140, PRDM5, IRF8, CAND1, PRDM1, NFIA</i>                                                                                                                                                                                                                                                                                                                                                                                                                                                                                                                                                                                                                                                                                                                                                                                                                                                                                                                                                                                                                                                                                                                                                                 |
| 5575  | 4.6 x10 <sup>-02</sup> | 180 | 16370 | Cellular component                   | <i>ADCY3, GNAI4, TNFSF15, RORC, MEGF10, TNFSF18, LNX1, PNN, AGTR1, BDNF, FAM49A, PRKAR2A, OLFML3, DAB1, STAC, GATA6, PDE4A, RLN2, C2ORF74, ROBO2, STK39, NPSR1, FAS, MTUS1, WWOX, DSCAM, SATB1, MAGI3, KCND2, STMN2, C11ORF30, SLC22A23, ACTN2, CD40, SP140, DCTN1, FGFR1OP, PGM1, PRDM5, PDGFRA, HSD11B2, PRDM1, LRRK2, CAMTA1, SNX9, SLC2A13, IL1R2, ARPP21, MOB2, ERBB4, GRB2, PFKFB3, DNAH14, KEL, SOX4, CCDC91, PRRC1, POMC, OR52N2, T, OR52N4, GALC, RPL3, OTUD7A, TMEM196, TEC, NKX23, ITK, GPR158, IKZF3, IL23R, PTPN2, IL1RL1, PODXL, NDFIP1, SMAD3, LGALS8, HEATR1, CACNA2D3, KCNK1, BTLA, ITGA9, TMEM117, TNFSF11, EPHA6, NPY, H3F3A, MARCKS, RIT2, ATG16L1, PLAU, ISX, E2F3, IER3IP1, GABBR1, GPLD1, NBEA, GLI3, SLA, LNPEP, DCAF13, TSPAN12, PLCB3, NOD2, TMEM174, CCNY, SLC22A4, BRD7, CSF2RB, SEMA3C, ETAA1, ANO4, IPMK, IFNGR1, KIRREL3, ATP8B4, KCNMA1, IL18RAP, PTGER4, CNTNAP4, NRXN3, FMR1NB, ARID5B, IRGM, SNAPC4, COL25A1, HAO1, PPM1G, CHRM5, ZMIZ1, SDCCAG3, MCC, CAND1, IL12B, THEM4, USP25, GADD45A, ICOSLG, GPR12, CD244, SBNO2, C9ORF57, KITLG, RTKN, ZNF365, CDKALI, MACC1, TRIB1, CDH8, ZFP36L1, CYLD, PLCL1, RNF123, REN, RNASET2, FNDC1, FAM71B, FUT2, COL8A1, KIF21B, ZNF804A, GEMIN2, SLC12A5, OR9G4, XPNPEP1, STAT3, FZD6, CDH12, MICALCL, CD19, RPS6KA4, EYS, NRAP, IRF8, IFT172, LRP2, NFIA, RBM17</i> |

x is the number of genes annotated to a certain GO class; n is the number of genes in the reference set annotated to a certain GO class
